# Supplementary material for: A highly distorted (10,3)-a coordination framework constructed from alternating T-shaped and trigonal nodes
Source: Royal Society of Chemistry journal article supplement (doi:10.1039/b503352g), 2005-01-01

## **Supplementary Information:**

*Selected bond lengths and angles:*

**Table S1.** Metal coordination spheres.

|                   | <b>A</b>   |            | <b>B</b>   |            |
|-------------------|------------|------------|------------|------------|
|                   | <b>Fe1</b> | <b>Fe2</b> | <b>Co1</b> | <b>Co2</b> |
| M-N7/1(tpt)       | 2.203(3)   | 2.199(3)   | 2.153(3)   | 2.156(3)   |
| M-N2/8(tpt)       | 2.211(3)   | 2.225(3)   | 2.173(3)   | 2.191(3)   |
| M-N3/9(tpt)       | 2.213(3)   | 2.217(3)   | 2.177(3)   | 2.189(3)   |
| M-N41/43(NCS)     | 2.118(3)   | 2.091(3)   | 2.090(3)   | 2.069(3)   |
| M-N42/44(NCS)     | 2.105(3)   | 2.095(3)   | 2.090(3)   | 2.055(3)   |
| M-O50/60(BzOH)    | 2.116(2)   | 2.212(2)   | 2.105(3)   | 2.193(3)   |
| N7/1 -M-N2/8(tpt) | 89.25(9)   | 90.82(9)   | 89.94(11)  | 90.84(12)  |
| N7/1 -M-N3/9(tpt) | 94.74(10)  | 96.43(10)  | 94.81(11)  | 96.23(11)  |
| N2/8 -M-N3/9(tpt) | 175.87(10) | 170.32(9)  | 175.23(12) | 171.65(12) |

### *Refinement Details:*

All ordered non-hydrogen atoms were modelled anisotropically. The aromatic C64 and C65 atoms of the BzOH molecule coordinated to Co2 in **B** gave large thermal ellipses when modelled as single anisotropic atoms and were each split into two isotropic sites with equal temperature factors. The occupations of the A and B components refined to 52.0(16) and 48.0(16)% respectively. The hydrogens attached to the coordinated oxygen atoms of the BzOH molecules were located from the difference map and restrained to ideal bond lengths. For both **A** and **B** the C73, C74 and C75 atoms of one of the un bound BzOH molecules could not be modelled anisotropically and were each split into two isotropic sites, with the A and B components refining to respective occupancy ratios of 50.6(6):49.4(6) for **A** and 53.2(7):46.8(7) for **B**. The hydrogens of the water molecule in both structures required bond length and/or angle restraints for stable refinement.



- $\text{Co}(\text{tpt})(\text{NCS})_2(\text{BzOH}) \cdot 2(\text{BzOH}) \cdot \frac{1}{2}(\text{H}_2\text{O})$  (**B**) at 150 K:

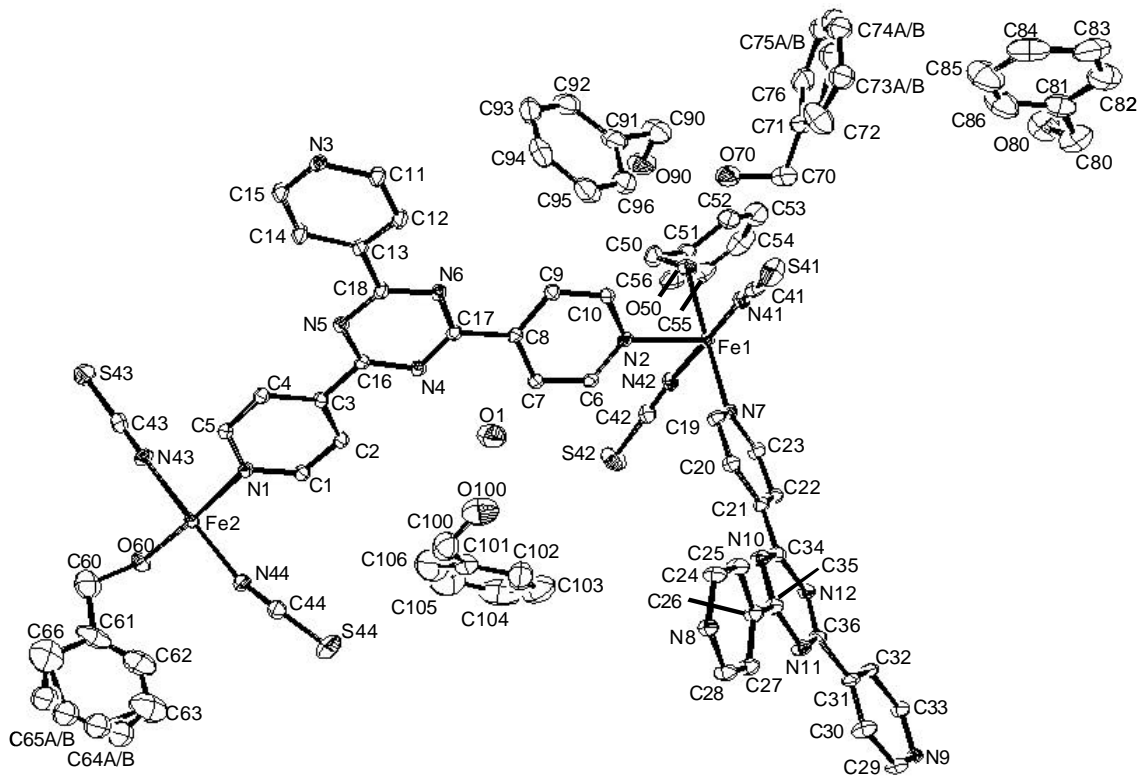

Supplement: b503352g.pdf [file b503352g.pdf]
